# Supplementary material
Source: publisher figshare collection journal article supplement (https://gsajournals.figshare.com/ndownloader/files/27743262)
Supplement: Supplementary file 1 [file 27743262]

| **Table S5.** Genome assembly result. | |  |  |
| --- | --- | --- | --- |
| **Category** | **FALCON-Unzip** | **purge_haplotigs** | **pilon** |
| # of contigs | 4,106 | 1,987 | 1,987 |
| Total size of contigs | 631,852,316 | 499,589,145 | 498,959,910 |
| Longest contig size | 3,033,288 | 30,033,288 | 3,031,456 |
| # of contigs > 1K nt | 4,106 | 1,987 | 1,987 |
| # of contigs > 10K nt | 4,106 | 1,987 | 1,987 |
| # of contigs > 100K nt | 1,536 | 1,268 | 1,268 |
| # of contigs > 1M nt | 70 | 70 | 70 |
| # of contigs > 10M nt | 0 | 0 | 0 |
| Mean contig size | 153,855 | 251,429 | 251,112 |
| Median contig size | 69,849 | 147,827 | 147,624 |
| N50 contig length | 316,684 | 465,438 | 464,585 |
| L50 contig count | 477 | 300 | 300 |
| GC Contents (%) | 45.81 | 45.64 | 45.64 |
